# Supplementary material
Source: PubMed Central journal article supplement (PMC2675720)
Supplement: pp.109.137067_1.pdf [file pp.109.137067_1.pdf]

## Supplemental Method

### PCR Analysis of Mutants

Primers for PCR analysis of the mutants were as follows: for *gpa1* mutants, *GPA1* gene specific primers 5'-TCGTGGTAATGAGCTTCAGGTTCC-3' and 5'-CCCACAGGGCTGCATAAACGAA-3' were used; for *atrbohD/F* mutant, insertion in *AtrbohD* was identified by the gene specific primers D211 5'-GTCGCCAAAGGAGGCGCCGA-3' and D92b 5'-GGATACTGATCATAGGCGTGGCTCCA-3', and the primer from transposon dSpm11 5'-GGTGCAGCAAACCCACACTTTTACTTC-3', and insertion in *AtrbohF* was identified by the gene specific primers F171 5'-CTTCCGATATCCTTCAACCAACTC-3' and F212 5'-CGAAGAAGATCTGGAGACGAGA-3', and the primer from transposon dSpm1 5'-CTTATTTTCAGTAAGAGTGTGGGGTTTTGG-3'; *Atnoa1* mutant was identified by *AtNOA1* gene specific primers 5'-CCTGCAACACAACAAGTTGACG-3' and 5'-GGGCGGATATAACCGTCTCCA-3', and the primer from T-DNA insertion sequence LBb1 5'-GCGTGGACCGCTTGCTGCAACT-3'.
